1  
2  
3  
4  
5  
6  
7  
8  
9  
10  
11  
12  
13  
14  
15  
16

**NorA, HmpX, and NorB cooperate to reduce NO toxicity during denitrification and plant pathogenesis in *Ralstonia solanacearum***

Alicia N. Truchon<sup>1,2</sup>, Connor G. Hendrich<sup>1,2</sup>, Adam F. Bigott<sup>1</sup>, Beth L. Dalsing<sup>1,2</sup>, Caitilyn Allen<sup>1\*</sup>

<sup>1</sup>Department of Plant Pathology, University of Wisconsin-Madison, Madison, WI 53706

<sup>2</sup>Microbiology Doctoral Training Program, University of Wisconsin-Madison, Madison, WI 53706

\*Corresponding author, [callen@wisc.edu](mailto:callen@wisc.edu), +1 608-556-3369

## Abstract

*Ralstonia solanacearum*, which causes bacterial wilt disease of many crops, needs denitrifying respiration to succeed inside its plant host. In the hypoxic environment of plant xylem vessels this pathogen confronts toxic oxidative radicals like nitric oxide (NO), which is generated by both bacterial denitrification and host defenses. *R. solanacearum* has multiple distinct mechanisms that could mitigate this stress, including Repair of Iron Cluster (RIC) homolog NorA, nitric oxide reductase NorB, and flavohaemoglobin HmpX. During denitrification and tomato pathogenesis and in response to exogenous NO, *R. solanacearum* upregulated *norA*, *norB*, and *hmpX*. Single mutants lacking  $\Delta norB$ ,  $\Delta norA$ , or  $\Delta hmpX$  increased expression of many iron and sulfur metabolism genes, suggesting that losing even one NO detoxification system demands metabolic compensation. Single mutants suffered only moderate fitness reductions in host plants, possibly because they upregulated their remaining detoxification genes. However,  $\Delta norA/norB$ ,  $\Delta norB/hmpX$ , and  $\Delta norA/hmpX$  double mutants grew poorly in denitrifying culture and *in planta*. Loss of *norA*, *norB*, and *hmpX* may be lethal, since the methods used to construct the double mutants did not generate a triple mutant. Aconitase activity assays showed that NorA, HmpX and especially NorB are important for maintaining iron-sulfur cluster proteins. Additionally, plant defense genes were upregulated in tomatoes infected with the NO-overproducing  $\Delta norB$  mutant, suggesting that bacterial detoxification of NO reduces pathogen visibility. Thus, *R. solanacearum*'s three NO detoxification systems each contribute to and are collectively essential for overcoming metabolic oxidative stress during denitrification, for virulence and growth in tomato, and for evading host plant defenses.

## Importance

The soilborne plant pathogen *Ralstonia solanacearum* (*Rs*) causes bacterial wilt, a serious and widespread threat to global food security. *Rs* is metabolically adapted to low oxygen conditions, using denitrifying respiration to survive in the host and cause disease. However, bacterial denitrification and host defenses generate nitric oxide (NO), which is toxic and also alters signaling pathways in both plants and the pathogen. *Rs* mitigates NO with a trio of mechanistically distinct proteins: NO-reductase NorB, Repair of Iron Centers NorA, and oxidoreductase HmpX. This redundancy, together with analysis of mutants and *in-planta* dual transcriptomes, indicates that maintaining low NO levels is integral to *Rs* fitness in tomatoes (because NO damages iron-cluster proteins) and to evading host recognition (because bacterially produced NO can trigger plant defenses).

48

49

## Introduction

50

51

52

53

54

55

56

57

58

59

60

61

62

63

64

65

66

67

68

69

70

71

72

73

74

75

76

77

*Ralstonia solanacearum* (*Rs*), a soil-dwelling plant pathogen, causes bacterial wilt disease on a wide range of economically important plants, including tomatoes. Bacterial wilt is a serious socioeconomic problem in tropical regions, especially in developing countries where crop loss can be devastating for subsistence farmers (1). To date, there is no effective control strategy to combat bacterial wilt (2). *Rs* draws on its broad repertoire of metabolic capabilities to survive in soil and water, invade plant roots, and colonize and obstruct its host's water-transporting xylem vessels (3). The pathogen's metabolism adapts rapidly as it transitions among diverse micro-niches in surface water, soil, and inside hosts (4, 5). Plant xylem vessels, the primary in-host habitat of *Rs*, contain little oxygen but have substantial levels of nitrate ( $\text{NO}_3^-$ ), around 30 mM (6).

Bacteria have several ways to make ATP under low oxygen conditions. These include fermentation and respiration using alternate terminal electron acceptors (TEAs) like sulfur, iron, and nitrogen (7). Nitrate respiration and denitrification require a series of membrane-bound and periplasmic enzymes that reduce  $\text{NO}_3^-$  stepwise to dinitrogen gas ( $\text{N}_2$ ) (8). Denitrifying respiration allows organisms to produce energy from  $\text{NO}_3^-$  in hypoxic environments such as soil, marine sediments, landfills, wastewater treatment plants, bioreactors, and inside eukaryotic hosts (8-15).

Nitrate metabolism is broadly conserved across plant pathogenic *Ralstonia spp.* (16-18). *Rs* strain GMI1000 has a complete pathway for denitrifying respiration wherein the nitrate reductase NarG reduces  $\text{NO}_3^-$  to  $\text{NO}_2^-$  (nitrite); the nitrite reductase AniA reduces  $\text{NO}_2^-$  to NO (nitric oxide); the nitric oxide reductase NorB converts NO to  $\text{N}_2\text{O}$  (nitrous oxide); and finally, the nitrous oxide reductase NosZ converts  $\text{N}_2\text{O}$  to  $\text{N}_2$  (Fig. 1). When *Rs* invades tomato stems, xylem oxygen levels decline even further and the pathogen's denitrification genes are substantially upregulated (6, 19). We previously established that *Rs* uses  $\text{NO}_3^-$  and its reduction products as TEAs to generate proton motive force that drives ATP synthesis (6). Possibly as a result, denitrification contributes quantitatively to *Rs* growth *in planta* and to bacterial wilt virulence (6, 19).

However, denitrifying respiration comes at a cost. The pathway generates two highly reactive nitrogen species (RNS):  $\text{NO}_2^-$  and NO (8, 15).  $\text{NO}_2^-$  and NO are toxic in their own right because they damage iron centers of important iron-sulfur cluster (Fe-S) heme proteins (20, 21). NO is both a RNS and a reactive oxygen species (ROS) that interacts with other oxygen or nitrogen species to form

78 even more damaging species like peroxyxynitrite (22). These secondary NO products have highly toxic  
79 effects on major cellular components including metalloproteins, lipids, and nucleic acids (22, 23).  
80

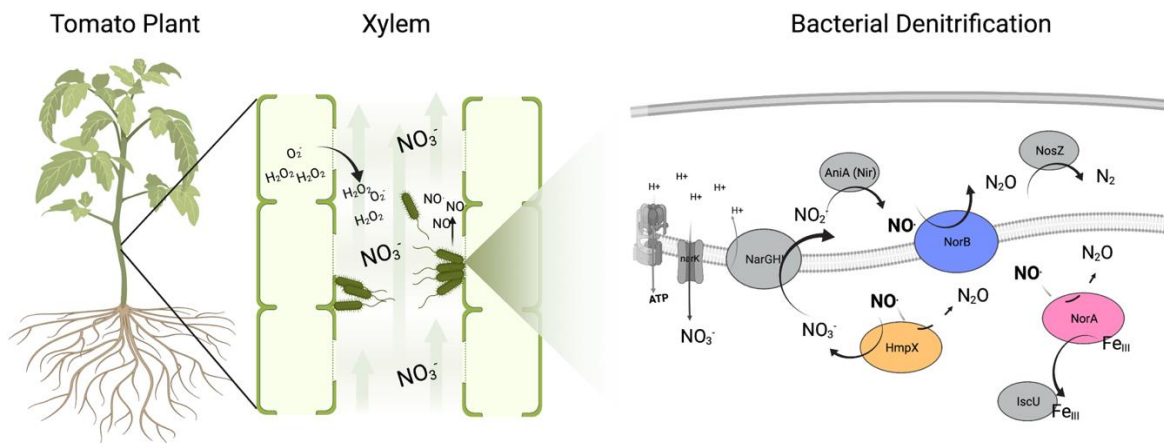

81  
82 **Figure 1. *Ralstonia solanacearum* strain GMI1000 denitrifies in tomato xylem, generating energy and**  
83 **NO.** Tomato plant xylem contains ~30 mM NO<sub>3</sub><sup>-</sup>. *Rs* uses denitrifying respiration to reduce NO<sub>3</sub><sup>-</sup> and generate  
84 ATP. Denitrification reduces NO<sub>3</sub><sup>-</sup> to N<sub>2</sub> gas via the enzymes NarGHI, AniA, NorB, and NosZ. NO<sub>3</sub><sup>-</sup>  
85 reduction generates toxic NO that must be oxidized, reduced, or sequestered to prevent cellular damage. In  
86 response to bacterial infection, tomato plants also produce oxidative compounds, including H<sub>2</sub>O<sub>2</sub>, and O<sub>2</sub><sup>-</sup>. *R.*  
87 *solanacearum* NorA, NorB, and HmpX proteins interact with NO by either reducing NO to N<sub>2</sub>O, oxidizing  
88 NO to NO<sub>3</sub><sup>-</sup>, or repairing iron centers damaged by NO. Figure created in part using BioRender.  
89

90 In addition to the NO generated by prokaryotic respiration, microbes encounter NO produced  
91 by their eukaryotic hosts (24, 25). NO can act as diffusible signal that does not require a carrier, and is  
92 a major plant signaling molecule that rapidly regulates plant defense functions, including cell death  
93 (26, 27). Many hosts also produce NO and H<sub>2</sub>O<sub>2</sub> to directly kill pathogens (28-31). In response to this  
94 oxidative attack, animal and plant pathogens including *Erwinia spp.*, *Pseudomonas spp.*,  
95 *Staphylococcus aureus*, and *Neisseria gonorrhoeae* use denitrification pathway enzymes like NO<sub>2</sub><sup>-</sup>  
96 reductase (NIR) and NO reductase (NOR) not only to produce energy but also to reduce the toxic load  
97 of RNS, sometimes by decoupling them from the electron transport chain (8, 12). Microbes have  
98 evolved additional specialized mechanisms to mitigate RNS stress (6, 8, 29, 30, 32-36). The  
99 flavohaemoglobin Hmp is an oxidoreductase that uses a globin-like NO-binding domain, NAD, and  
100 FAD to catalyze the conversion of NO and O<sub>2</sub> to NO<sub>3</sub><sup>-</sup> when oxygen is available, or to reduce NO to  
101 N<sub>2</sub>O in the absence of O<sub>2</sub> (28, 30, 37, 38). Homologs of Hmp are present across the bacterial domain  
102 (28, 29, 39). A second protective mechanism involves NO-inducible Repair of Iron Centers (RIC) di-

103 iron proteins. RICs use a hemerythrin-like domain to decrease oxidative damage by interacting with  
104 iron storage proteins like Dps and IscU to deliver iron to damaged Fe-S clusters (36, 40-44).

105 The *Rs* GMI1000 genome has genes encoding a putative RIC protein, NorA; a NO reductase,  
106 NorB; and an oxidoreductase, HmpX. When *Rs* grows in tomato xylem, *norA*, *norB*, and *hmpX* are  
107 upregulated 75-, 51-, and 43-fold respectively, relative to when *Rs* grows in rich media (19). These  
108 were among the most differentially expressed genes *in planta*, where *Rs* cells experience an oxidative  
109 environment (19, 31, 45). This upregulation implied that during plant pathogenesis, *Rs* depends on  
110 the products of *norA*, *norB*, and *hmpX* to mitigate oxidative stress produced by its own denitrifying  
111 respiration and by the plant host. This functional redundancy suggested that detoxifying NO is  
112 critically important for *R. solanacearum*. We tested this hypothesis using a panel of single and double  
113 mutants lacking *norA*, *hmpX*, and *norB* combined with transcriptomic, biochemical, and plant assays.

## 114 **Materials and Methods**

### 115 **Bacterial Growth Conditions**

116 The *R. solanacearum* and *Escherichia coli* strains used are listed in Table S5. *E. coli* strains  
117 were grown in LB broth and *R. solanacearum* strains were grown on rich CPG media at 28°C, shaking  
118 at 225 rpm unless otherwise noted. As appropriate, antibiotics were used at the following  
119 concentrations: 25 ug/ml kanamycin and 10 ug/ml tetracycline. We grew bacteria under the  
120 previously determined denitrifying conditions: in VDM media modified with 30 mM NO<sub>3</sub> in low  
121 oxygen (either 0 or 0.1% O<sub>2</sub>), with shaking at 225 rpm or on medium speed in a microplate reader  
122 (BioTek, Winooski, VT, USA) (6). For hypoxic assays, bacteria were grown in an anaerobic chamber  
123 (InvivoO2, Baker Ruskinn, Sanford, Maine, USA) set to 0.1% O<sub>2</sub>. For anoxic assays, cells were grown in  
124 GasPak pouches (BD, Franklin Lakes, NJ, USA).

### 125 **Mutant construction**

126 All *Rs* mutants were constructed in phylotype I sequevar 18 strain GMI1000. Unmarked  $\Delta$ *norA* and  
127  $\Delta$ *norR* mutants lacking the complete *norA* or *norR* ORF were generated using Gibson assembly and  
128 *sacB* positive selection vector pUFR80 as described.(46) Briefly, PCR with KapaHiFi DNA-polymerase  
129 was used to amplify up- and down-stream regions of Rsp0958 (*norA*) or Rsp0959 (*norR*); PCR  
130 fragments were annealed with pUFR80 to form either pUFR80-*norA* or pUFR80-*norR*, which were  
131 then transformed into GMI1000; and kanamycin and sucrose selection were used to generate clean  
132

133 in-frame deletion mutants. Double mutants were made by transforming previously constructed  
134 plasmids into the  $\Delta norA$  or previously constructed  $\Delta norB$  and  $\Delta hmpX$  mutant backgrounds (6). All  
135 mutants were confirmed with sequencing. All primers and mutant strains are listed in Supporting  
136 Information Table S5.

### 137 **Plant experiments**

138 Disease assays were conducted as previously described (47). Briefly, wilt-susceptible cv.  
139 Bonny Best tomato plants were grown at 28°C with a 12 h day-night light cycle and watered daily  
140 with 0.5X strength Hoagland's solution. Two-week-old seedlings were transplanted into 4-inch pots  
141 containing ~80 g potting mix. Two days later, unwounded plants were inoculated by drenching the  
142 soil with 50 mL of a  $1 \times 10^8$  CFU/mL bacterial suspension. Inoculum was determined turbidometrically  
143 and confirmed by dilution plating as described (48). Plant wilt symptoms were rated using a 0-4  
144 disease index for 14 days (48).

### 145 **Alignments**

146 NCBI BLASTp non-redundant protein sequence database (<https://blast.ncbi.nlm.nih.gov>) was  
147 used to compare percent amino acid identity (% AA ID) and percent query cover (% QC) of *R.*  
148 *solanacearum* NorA, NorB, and HmpX to *C. necator*, *N. gonorrhoeae*, *S. aureus*, *E. coli*, *S. enterica*,  
149 and *X. fastidiosa*. MUSCLE multiple sequence alignment tool  
150 (<https://www.ebi.ac.uk/Tools/msa/muscle>) was used to align *R. solanacearum* NorA, NorB, and  
151 HmpX amino acid sequences with homologs in *C. necator*, *N. gonorrhoeae*, *S. aureus*, *E. coli*, *S.*  
152 *enterica*, and *X. fastidiosa*.

### 153 **RNA extraction and Transcriptomic Analyses**

#### 154 *RNA extraction*

155 RNA was collected from denitrifying *R. solanacearum* bacterial cultures or from stem tissue of  
156 plants 72 h after petiole-inoculation with *Rs* strain GMI1000,  $\Delta norB$ , or water.

157 For transcriptomes of cultured cells, bacteria were grown in triplicate in VDM +30 mM  $\text{NO}_3^-$   
158 without shaking for 16 h at 28°C in 0.1%  $\text{O}_2$ . Sub-samples were dilution-plated to determine CFU/ml,  
159 then samples were centrifuged at room temperature for 5 minutes at 3000 x *g*, supernatant was  
160 removed, and pellets were frozen in liquid nitrogen. Total RNA was extracted using a modified  
161 version of the Quick-RNA™ MiniPrep Kit (Zymo Research, Irvine, CA, USA). Briefly, frozen pellets  
162 were resuspended in 400  $\mu\text{L}$  cold TE pH 8 with 1 mg/mL lysozyme, 0.25  $\mu\text{L}$  Superase inhibitor  
163 (Ambion, Austin, TX, USA), and 80  $\mu\text{L}$  OF 10% SDS, vortexed for 10s, then transferred to a new 2 mL

164 tube, shaken at 300 rpm for 2 min. 800  $\mu$ L of RNA-Lysis buffer was added, then samples were cleaned  
165 according to the kit manufacturer's instructions. Samples were eluted in 100  $\mu$ L nuclease-free water  
166 then DNA was then removed using the DNA-free DNase kit according to manufacturer's instructions  
167 for Rigorous DNase treatment (Invitrogen, Carlsbad, CA, USA). After DNase inactivation, samples  
168 were further cleaned by chloroform extraction, precipitated overnight at  $-20^{\circ}\text{C}$  with 100  $\mu$ M Sodium  
169 Acetate pH 5.5 and 66% ethanol. Samples were checked for concentration on a Nanodrop (Thermo  
170 Fischer Scientific, Wilmington, DE, USA), for DNA contamination by PCR using the qRT-PCR primers  
171 *serC\_F/R*, and for RNA integrity (RIN) using Agilent bioanalyzer 21000 (Agilent, Santa Clara, CA, USA).  
172 All sequenced samples had RIN values above 7.3 (49).

173 For dual plant-pathogen transcriptomes *in planta*, samples were harvested 21 days after  
174 susceptible cultivar Bonny Best tomatoes were inoculated with  $\sim 2000$  CFU of each bacterial strain  
175 through the cut petiole. 72 h after inoculation approximately 0.1 g stem tissue was collected from  
176 the site of inoculation, immediately frozen in liquid nitrogen and stored at  $-80^{\circ}\text{C}$ . Another 0.1 g of  
177 tissue was collected from directly below the inoculation site, ground in bead beater tubes using a  
178 PowerLyzer (Qiagen, Hilden, Germany) for two cycles of 2200 rpm for 90 s with a 4 min rest between  
179 cycles. This material was then dilution plated to measure bacterial colonization. Total RNA was then  
180 extracted from stem samples colonized with between  $10^8$  and  $10^9$  CFU/g of tissue using a hot-phenol  
181 chloroform method (19). Between 4 and 5 individual plants were pooled per biological replicate.  
182 Nucleic acid sample quality was checked using a nanodrop, Agilent bioanalyzer, and qRT-PCR primers  
183 *Actin\_F/R* (49). All samples had RIN values above 7.2.

184 All RNA samples were sent to Novogene (Beijing, China) for cDNA library construction,  
185 sequencing, and analysis.

### 186 *Differential expression analysis*

187 Differential expression analysis (for DESeq with biological replicates) was performed using the DESeq  
188 R package (1.18.0) (50). DESeq provided statistical routines for determining differential expression in  
189 digital gene expression data using a model based on the negative binomial distribution. The  
190 Resulting P-values were adjusted using the Benjamini-Hochberg approach for controlling the false  
191 discovery rate. Genes with an adjusted P-value of  $<0.05$  found by DESeq were assigned as  
192 differentially expressed.

## 193 *R methods*

194 Transcriptional groups of interest were manually selected from GO biological process and  
195 cellular function groups. Genes possessing GO annotations referring to multiple transcriptional  
196 groups were assigned with priority as follows: Iron, Sulfur, Nitrogen, Oxidative Stress, Cellular  
197 Damage, Regulators. Visualization of differential expression using RPMK and log 2-fold change was  
198 done in R (version 4.1.0) using the base and graphics packages.

### 199 **qRT-PCR Gene Expression**

200 *Rs* cells were grown in 15 ml conical tubes in BD Gaspak anaerobic jars (BD, Franklin Lakes, NJ)  
201 for 15 h then 1 mM or 0 M SNP was added and grown for 3 h under hypoxic denitrifying conditions as  
202 described above. Total RNA was extracted using a hot phenol chloroform method as described (19).  
203 DNA was removed with DNafree DNase (Invitrogen, Life Technologies, Carlsbad, CA) and cDNA and  
204 no-RT controls were synthesized from 200 ng to 1 ug RNA using the SuperScript VILO cDNA synthesis  
205 kit (Life Technologies, Carlsbad, CA). The qRT-PCR reactions were run in triplicate with 5 ng cDNA and  
206 Power Up SYBR Green Master Mix (Applied Biosystems, Foster City, CA) in a 10 uL volume using an  
207 ABI 7300 Real Time PCR System (Applied Biosystems, Foster City, CA). Relative gene expression was  
208 calculated using the  $2^{-\Delta\Delta CT}$  method, normalizing to the consistently expressed *rplM* gene (51).  
209 All primer sets amplified fragments between 100-200 bp and had 90-110% efficiency and are listed in  
210 Supporting Information Table S5.

### 211 **Oxidative Stress Assay**

212 Denitrifying *R. solanacearum* cells were grown in VDM + 30mM  $\text{NO}_3^-$  in 96-well microtiter  
213 plates in anaerobic pouches (BD, Franklin Lakes, NJ) in a 28°C shaking incubator at 225 rpm. After 16  
214 h cells were treated with 0 M or 100 uM Spermine-NONOate and 0 M or 500 uM  $\text{H}_2\text{O}_2$  and returned  
215 to pouches with fresh anaerobic sachets for 3 h. After this second incubation, bacterial survival was  
216 measured as cell density in a microplate reader (BioTek, Winooski, VT, USA) using absorbance at  
217 600nm ( $\text{ABS}_{600}$ ).

### 218 **Quantification of intracellular aconitase activity**

219 *Rs* strains were grown overnight in 5 mL VDM at 28°C, 0%  $\text{O}_2$  and cultures were standardized  
220 turbidometrically. About  $10^{10}$  CFU were pelleted and resuspended in water with 20 mg/mL lysozyme  
221 (Sigma-Aldrich) to a 5 mL volume, then incubated on ice for 45 minutes. Cell suspensions on ice were  
222 then sonicated with a needle sonicator at 40% amplification for ten 30 s pulse cycles with 10 s  
223 between cycles. The resulting lysates were then used in the aconitase assay (Sigma-Aldrich) in a 96



224 well plate format according to the kit instructions. Samples were measured at 450 nm in a microplate  
225 reader (BioTek, Winooski, VT, USA) and analyzed to determine units of activity per cell according  
226 assay protocol.

## 227 228 **Results**

### 229 ***norA*, *norB*, and *hmpX* are upregulated in denitrifying cultures and by exogenous NO.**

230 The proteins encoded by *norA*, *norB*, and *hmpX* in *Rs* strain GMI1000 are conserved across  
231 diverse bacteria, including environmental isolates and plant and animal pathogens (Table S1A).  
232 Further, all three were encoded in genomes of the several hundred sequenced strains in the *R.*  
233 *solanacearum* species complex. Previous functional analyses demonstrated that *Rs norB* encodes an  
234 NO reductase and *hmpX* encodes an oxidoreductase (6). We identified locus Rsp0958 as *norA*  
235 because its product resembles known single-heme domain proteins that reduce NO and H<sub>2</sub>O<sub>2</sub>  
236 oxidative stress by replacing damaged di-iron centers in Fe-S cluster proteins (36, 40). It is most  
237 similar to NorA from *C. necator* (73% AA identity), and to YTFE from *Salmonella enterica* and DnrN  
238 from *N. gonorrhoeae* (~50% AA identity), which have been implicated in oxidative stress mitigation  
239 (Table S1A). *Rs* NorA, NorB, and HmpX each contain the highly conserved heme or globin metal  
240 cofactor binding domains necessary to reduce NO toxicity (Fig. S1). These genomic analyses  
241 suggested *Rs* NorA, NorB, and HmpX could all contribute to mitigating oxidative damage.

242 A previous transcriptomic analysis found that when *Rs* grows in the oxidatively stressful plant host  
243 environment, the pathogen upregulates *norA*, *norB*, and *hmpX* by 75, 51, and 43-fold, respectively,  
244 relative to their expression in rich media (19, 31, 45). Indeed, these were among the genes most  
245 differentially expressed *in planta* (Table S1B). *norA*, *norB*, and *hmpX* were also highly expressed in  
246 denitrifying *Rs* cells cultured at 0.1% O<sub>2</sub>, a condition that produces an oxidative environment.  
247 Treating denitrifying cultures with exogenous NO further increased expression of *norA* (5-fold, *P*=  
248 0.0211, one sample t-test), *norB* (9-fold, *P*=0.0552), and *hmpX* (8-fold, *P*= 0.0255) (Fig. 2). This  
249 significant up-regulation of *norA*, *norB*, and *hmpX* in the oxidative plant environment, and in  
250 response to exogenous NO is consistent with the hypothesis that these genes are important for NO  
251 metabolism.

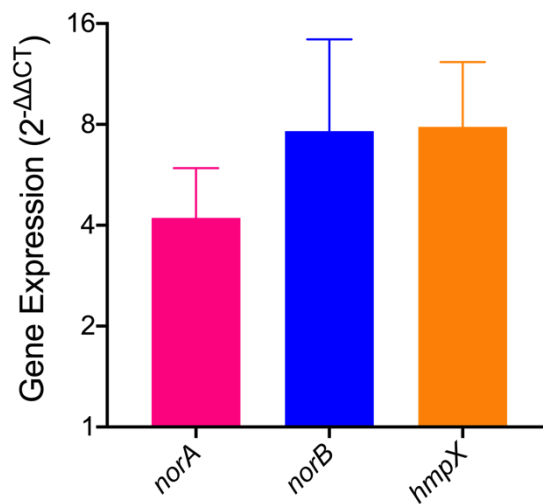

**Figure 2. Exogenous NO induces expression of *norA*, *norB*, and *hmpX*.** Relative gene expression, of wild-type *R. solanacearum* GMI1000 as determined by qRT-PCR. RNA was extracted from *R. solanacearum* cells cultured for 16 h under denitrifying conditions (VDM + 30 mM NO<sub>3</sub><sup>-</sup> with 0.1% O<sub>2</sub>), then treated with 1 mM NO donor sodium nitroprusside for 3 h in denitrifying conditions. Gene expression is relative to untreated *R. solanacearum* cells. Wild-type gene expression for *norA*, *norB*, and *hmpX* was normalized to *rplM*. Data are mean +/- SEM (*norA*, P = 0.0211; *norB*, P = 0.0552; *hmpX*, P = 0.0255, one sample t-test). Data are mean of 4 biological experiments, each containing 3 technical replicates. Fold change was calculated using the 2<sup>-ΔΔCT</sup> method.

To explore whether these three genes are all under the control of the same NO-responsive regulator, we used RegPrecise to find predicted binding sites (52). Binding sites for the NO-responsive Rrf2 family regulator NsrR were present 5' of *norB* and *hmpX*, but not *norA*. Upstream of *norA* we found a binding site for NorR, the predicted NO-inducible sigma-54 dependent Fnr family regulator. This suggested these genes are under different regulons. In *Rs*, NsrR is predicted to have nine genes in its regulon, but NorR is predicted to regulate only the *norAR* operon (52, 53). However, in other bacteria such as the closely related *C. necator* NorR regulates both *norA* and *norB* (53-56). To confirm the bioinformatic prediction that *Rs* NorR exclusively regulates *norA*, we measured expression of *norA*, *norB*, and *hmpX* in a  $\Delta$ *norR* deletion mutant. Indeed, when *Rs*  $\Delta$ *norR* grew under denitrifying conditions, *norA* expression was reduced 15-fold relative to the wild-type parent strain, while expression of *norB* and *hmpX* did not change (Fig. S2A). This indicates that *norB* and *hmpX* are not regulated by NorR, and that the *Rs* response to NO is complex and involves at least two distinct regulatory mechanisms (Fig S2B). This finding prompted us to investigate the functional interplay of NorA, NorB, and HmpX.

## ***ΔnorA*, *ΔnorB*, and *ΔhmpX* mutants upregulate iron and sulfur metabolism in denitrifying conditions**

Oxidative molecules like NO cause nitrosative stress that damages cellular components including Fe-S proteins, lipids, and DNA, leading to the SOS response (39, 57, 58). We hypothesized that cells lacking putative stress mitigation genes *norA*, *norB*, or *hmpX* would suffer nitrosative damage that would be reflected in altered expression of genes encoding iron, sulfur, and repair pathways. We tested this hypothesis by profiling the transcriptomes of wild-type and *ΔnorA*, *ΔnorB*, and *ΔhmpX* strains after 16 h growth in denitrifying conditions, a timepoint when NO<sub>3</sub><sup>-</sup> respiration generates NO and nitrosative stress. All three mutations substantially affected the *Rs* transcriptional profile. Relative to wild-type *Rs*, the *ΔnorA* and *ΔhmpX* mutants had 187 and 281 differentially expressed genes (DEGs), respectively. A surprising 2/3 of the genome, or 4105 of 6200 ORFs, were differentially expressed in the *ΔnorB* mutant (Fig. 3).

Many of the 187 DEGs in the *ΔnorA* mutant were upregulated and predicted to be involved in stress tolerance, iron acquisition, and inorganic nitrogen metabolism (Fig. 3A). Among the most upregulated DEGs were the iron homeostasis regulator *fur2*; Rsp0415 encoding the putative iron-stress response sigma-factor RpoE; and Rsp0421 putatively encoding RhbC, a component of siderophore synthesis. Among the most abundantly expressed DEGs were: *narG* and *narH* encoding subunits of a nitrate reductase, and Rsc0754 encoding putative peroxidase AhpC. In *ΔnorA*, *hmpX* was slightly downregulated 1.96-fold ( $P = 3.21E-5$ ) and *norB* expression was not significantly different from wild-type, although it was already in the wild type strain's top 10 most abundantly expressed genes (Table S2). Overall, this transcriptomic profile suggests that loss of the predicted RIC protein NorA causes increased oxidative stress that affects iron metabolism, but that the *ΔnorA* mutant mitigates this by upregulating genes for a wide range of protective mechanisms.

In the *ΔhmpX* mutant, about half of the 281 DEGs were upregulated and were related to inorganic nitrogen or sulfur metabolism (Fig. 3B). Among the most highly upregulated genes were *nsrR*, encoding a nitrate sensitive repressor; *hsdM* (Rsc3396) and *hsdR* (Rsc3384), encoding a putative type I restriction modification system; and *sbp*, encoding a sulfate binding protein involved in cysteine synthesis. Although *norB* was slightly downregulated in *ΔhmpX* (1.61-fold,  $P = 1.29E-5$ ) and *norA* expression was not significantly different from wild type, both genes remained in the top 20 most abundantly expressed genes, and *norB* was the single most abundant gene transcript expressed by *ΔhmpX* in denitrifying conditions (Table S1B). This profile suggests that *ΔhmpX* is still metabolizing

307

NO and may pivot its metabolic strategies to acquire more sulfur to address damage to iron, sulfur,

308

or Fe-S cluster proteins.

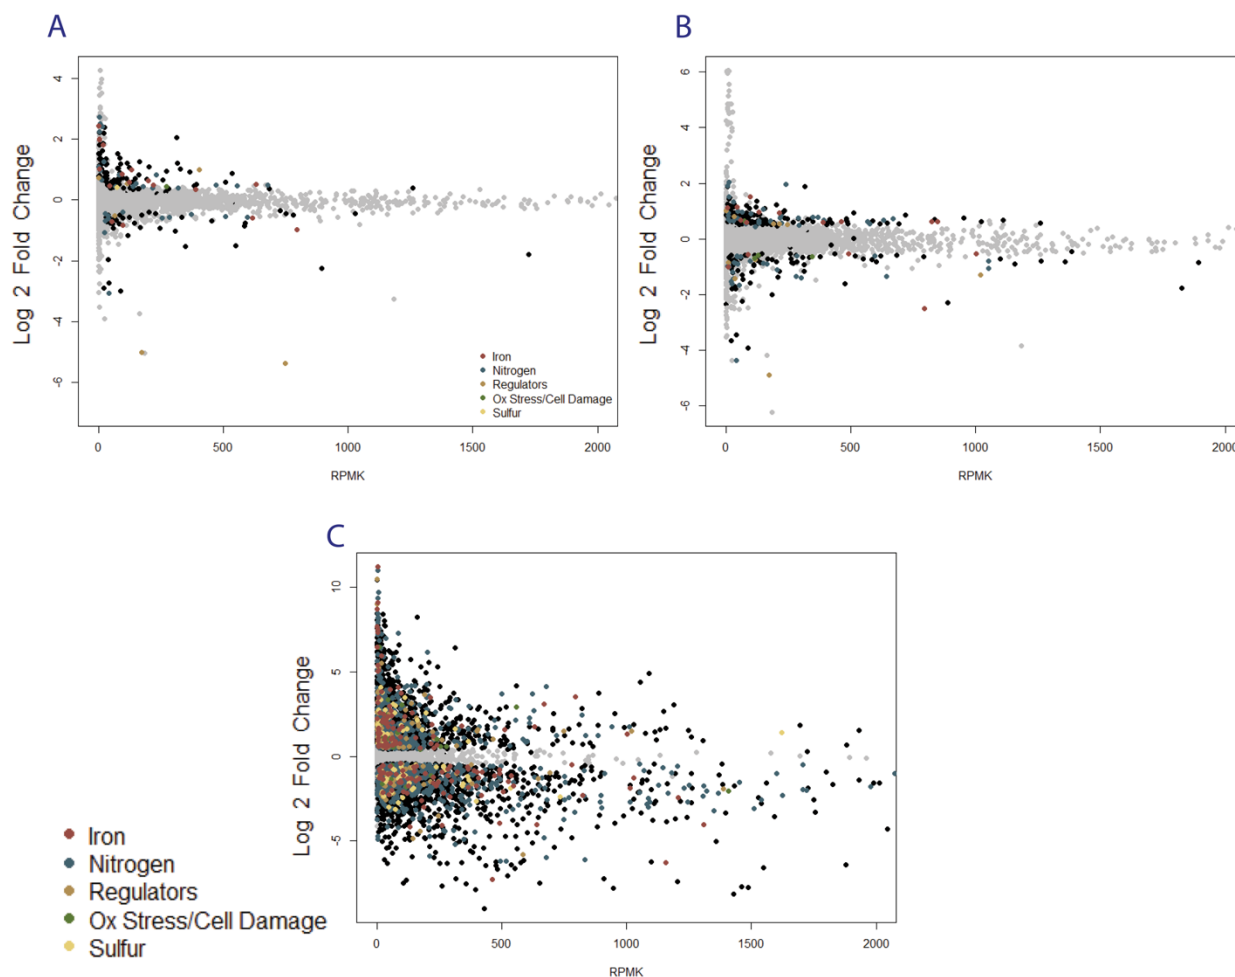

309

310

**Figure 3. Transcriptomic profiles of *R. solanacearum*  $\Delta norA$ ,  $\Delta norB$ , and  $\Delta hmpX$  mutants relative to**

311

**wild-type.** Plots showing gene expression in  $\Delta norA$  (A);  $\Delta norB$  (B), and  $\Delta hmpX$  (C). RNA was extracted

312

and sequenced from bacteria after 16 h growth in denitrifying conditions (VDM + 30 mM  $NO_3^-$  with 0.1%

313

$O_2$ ). Log2-fold change in expression is plotted against reads per million per kilobase (RPMK) to show

314

change in regulation vs. transcript abundance, relative to gene expression in wild-type *R. solanacearum*

315

strain GMI1000. Differentially expressed genes (defined as  $P < 0.05$ ,) are shown in black, except for genes

316

with GO terms related to iron metabolism (red), nitrogen metabolism (blue), regulators (brown), oxidative

317

stress and cellular damage (green), sulfur metabolism (yellow). Genes not differentially expressed are shown

318

in grey. Of the 6108 open reading frames in the *R. solanacearum* genome,  $\Delta norA$  had 187 DEGs,  $\Delta hmpX$

319

had 281 DEGs, and  $\Delta norB$  had 4112 DEGs compared to wild-type cells.

320

321

Loss of the NO reductase NorB had the most dramatic transcriptional effect. Genes involved in iron metabolism, sulfur metabolism, or cellular repair were most highly upregulated (Fig. 3C). The top three most upregulated genes, all encoding iron acquisition proteins, were upregulated over 1000-fold ( $P < 3.34E-67$ ). Even the regulator *fur2* was upregulated 854-fold ( $P = 6.26E-89$ ). The  $\Delta norA$  and  $\Delta hmpX$  transcriptomes showed similar trends but with a smaller magnitude than in  $\Delta norB$  (Fig. 3C). In addition,  $\Delta norB$  significantly upregulated *norA* and *hmpX* by 2.43-fold ( $P = 1.38E-9$ ) and 11.67-fold ( $P = 1.9E-58$ ), respectively (Table S1B).

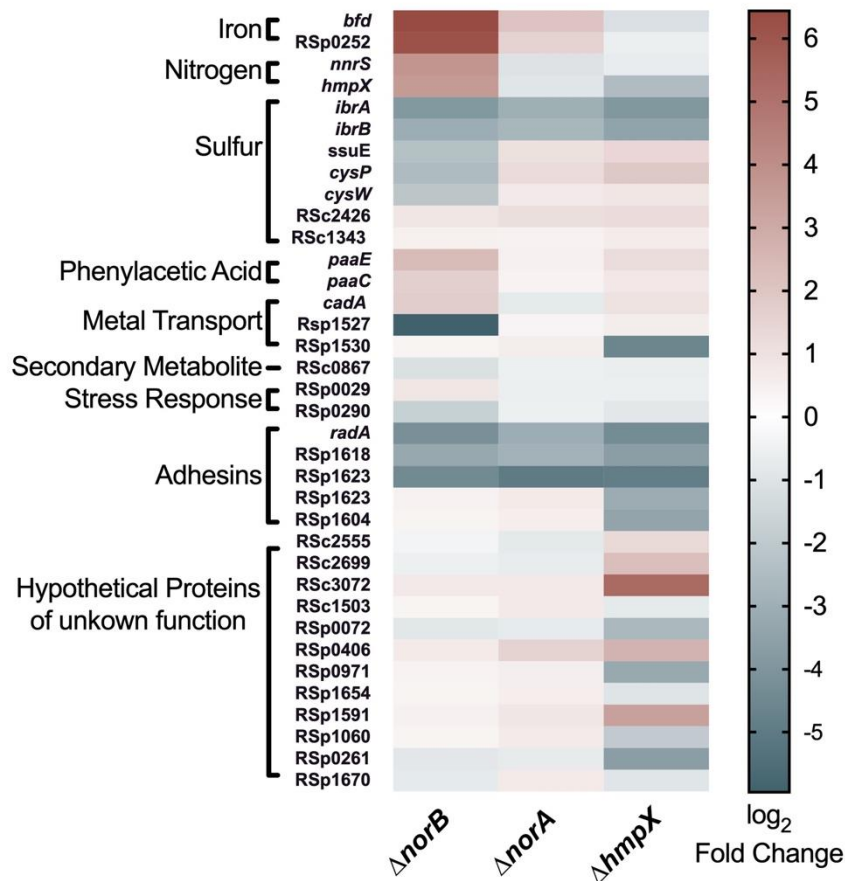

**Figure 4. *R. solanacearum* mutants lacking NorA, NorB, and HmpX differentially expressed some of the same genes.** RNA was extracted and sequenced from bacteria after 16 h growth in denitrifying conditions (VDM + 30 mM NO<sub>3</sub><sup>-</sup> with 0.1% O<sub>2</sub>). Differentially expressed genes (DEGs, relative to wild-type strain GMI1000) from all three mutants were compared, and shared DEGs were joined with SQL. Known or putative function was used to sort genes into categories labeled on the left. Log<sub>2</sub> fold change is represented as a heat map showing expression of selected shared DEGs relative to expression levels to wild-type cells. Red indicates upregulated genes, white indicates genes not significantly different from wild-type, and blue indicates downregulated genes, as shown in the scale bar at right.

340 The global up regulation of iron homeostasis regulators like *fur2* in  $\Delta norA$  and  $\Delta norB$  mutants  
341 indicated damage to Fe-S cluster proteins, but  $\Delta hmpX$  and  $\Delta norB$  also upregulated error-prone DNA  
342 polymerase *dnaE2* 1.62-fold ( $P=0.029$ ) and 118.05-fold ( $P=2.18E-32$ ) respectively, suggesting that  
343 cells lacking *hmpX* or *norB* also experience oxidative damage to DNA.

344 More broadly, mutants lacking either *norA*, *norB*, or *hmpX* shared 43 common DEGs, 21 of  
345 which have known homologs or domains with predicted function (Fig. 4). All three mutants  
346 differentially expressed bacterioferritin-encoding *bfd* and seven genes related to sulfur metabolism.  
347 Further, all three mutants upregulated *paaE*, which is predicted to encode degradation of  
348 phenylacetic acid (PAA) or a plant auxin growth hormone, which could interact with plant hosts.  
349 Interestingly, the most downregulated genes for all three mutants were in the Rsp1617-1623 operon  
350 (about 10-30-fold,  $P < 0.021949$ ), which is predicted to be involved in cell attachment. Together  
351 these shared DEGs suggest that all three mutants suffer enough RNS to cause detectable cellular  
352 damage.

### 353 **A mutant lacking *norB* accumulates NO in culture, and has severely reduced virulence *in planta***

354 Transcriptomic analysis suggested that *norA*, *norB*, and *hmpX* are important for mitigating  
355 RNS stress that *Rs* experiences during denitrifying respiration in culture and in the low-oxygen plant  
356 host xylem (6, 19). We directly tested this hypothesis by assessing in culture and *in planta* behaviors  
357 of *Rs* deletion mutants lacking *norA*, *norB*, or *hmpX* (Fig. 5).

358 In aerobic culture, when *Rs* does not denitrify, the  $\Delta norA$ ,  $\Delta norB$ , and  $\Delta hmpX$  strains grew as  
359 well as parent strain GMI1000 (Figure S3). None of the three mutants grew as well as wild type in  
360 hypoxic denitrifying culture, although their growth was affected to differing degrees (Fig. 5A). For the  
361 first 24 h,  $\Delta norA$  and  $\Delta hmpX$  grew like wild type, but their growth plateaued at ~36 and ~28 h,  
362 respectively, while wild type did not enter stationary phase until ~48 h. Growth of the  $\Delta norB$  mutant  
363 under denitrifying conditions plateaued much earlier at ~12 h, while wild type was still in early log  
364 phase growth. The limited growth of the  $\Delta norB$  mutant was consistent with development of toxic  
365 conditions that interfered with bacterial growth.

366 To directly test whether these three mutants accumulate NO, we used the NO-specific  
367 fluorescent probe DAF-FM-DA to measure NO accumulation over time in denitrifying cultures (Fig.  
368 5B). The ~12 h growth plateau of the  $\Delta norB$  mutant correlated exactly with a rapid accumulation of  
369 NO in the culture, which contained at least 10 times more NO than wild-type cultures. Wild type,

370  
371  
372

$\Delta norA$ , and  $\Delta hmpX$  cells did not accumulate detectable amounts of NO, likely because NorB reduces NO almost as fast as it is produced in all three strains.

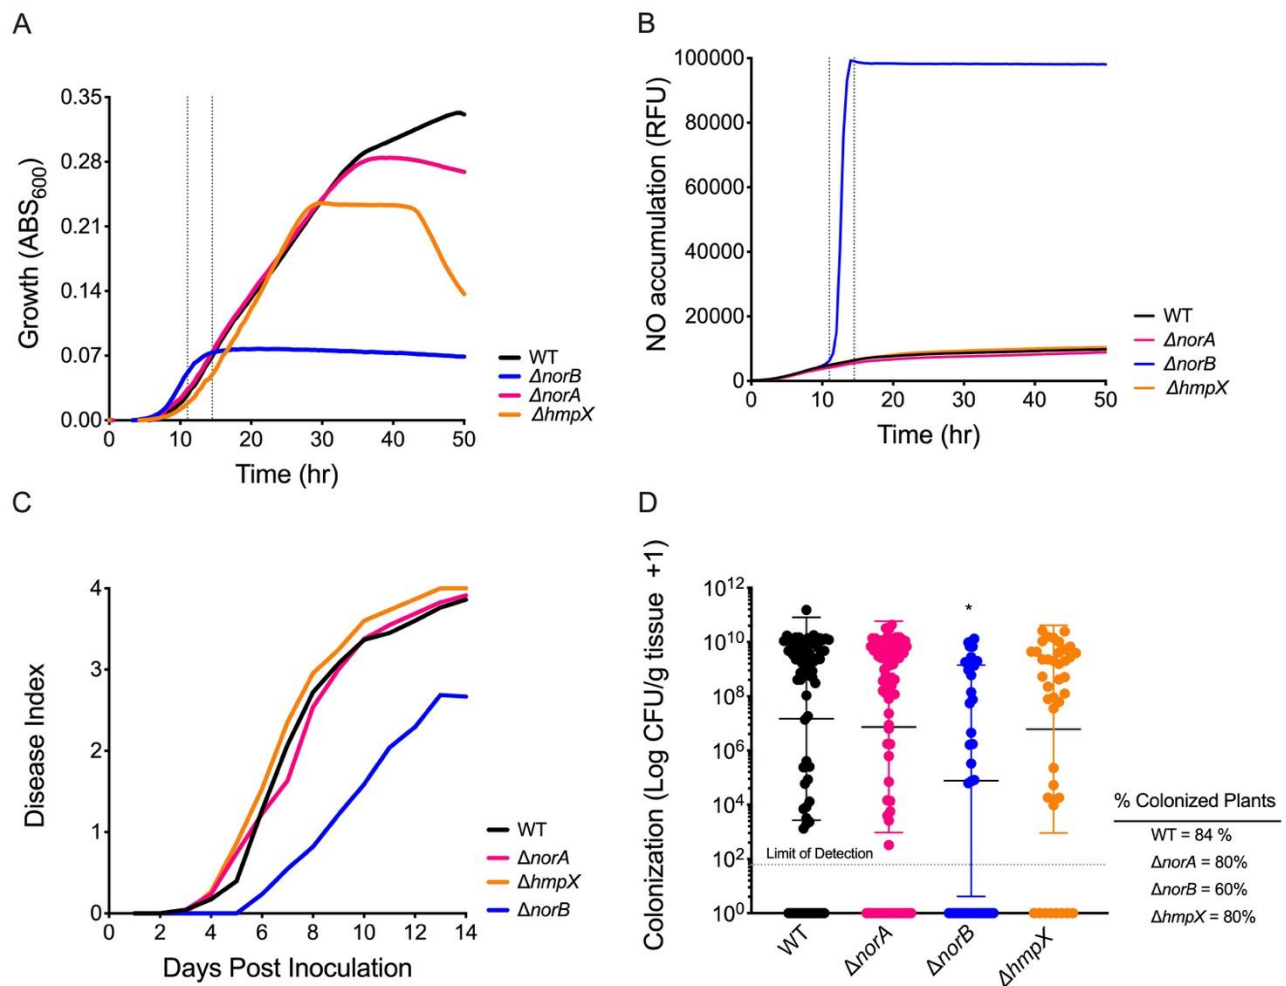

373  
374

375  
376  
377  
378  
379  
380  
381  
382  
383  
384  
385  
386  
387

**Figure 5. Behavior of *R. solanacearum*  $\Delta norA$ ,  $\Delta norB$ , and  $\Delta hmpX$  mutants in denitrifying culture conditions and *in planta*.** **A.** Growth of wild type and mutant *R. solanacearum* cells in denitrifying conditions (VDM + 30 mM NO<sub>3</sub><sup>-</sup> with 0.1% O<sub>2</sub>) in shaking 96 well plates, shown as Abs<sub>600</sub>. Data are mean±SEM Data and are mean of 4 biological experiments, each with 3 technical replicates. Gray bars represent time of toxic NO accumulation ~12 h. **B.** Accumulation of nitric oxide (NO) over time in the cultures in panel A, measured as relative fluorescence units using the NO-specific fluorescent indicator DAF-FM-DA. Excitation and emission measured at 495/515 nm. Data are mean of 4 biological experiments, each with 3 technical replicates. Gray bars represent time of toxic NO accumulation ~12 h. **C.** Bacterial wilt disease progress on 16-day-old wilt-susceptible ‘Bonny Best’ tomato plants following naturalistic soil-soak inoculation with 1x10<sup>8</sup> CFU wild-type or mutant *R. solanacearum* cells. Plants were assessed for wilt symptoms on a scale of 0-4 over 14 days. Data shown represent the mean disease index of 45-93 plants in 3-6 biological replicates. Virulence of the  $\Delta norB$  mutant was lower than that of the three other strains ( $P = 0.0018$ , Repeated Measures ANOVA). **D.** *R. solanacearum* population sizes in tomato mid-stems 4 days after

388  $2 \times 10^6$  CFU of *R. solanacearum* were applied to the cut petiole of the first true leaf. Bacterial populations were  
389 quantified by grinding and serially dilution  
390

391 We previously determined that  $\Delta norB$  has a virulence defect, and that neither  $\Delta norB$  nor  
392  $\Delta hmpX$  colonize tomato plants as well as wild-type following a naturalistic soil-soak inoculation (6).  
393 To see if loss of *norA* also affected these behaviors, we inoculated tomato plants with either  $\Delta norA$ ,  
394  $\Delta norB$ , or  $\Delta hmpX$ . The  $\Delta norB$  mutant caused significantly reduced bacterial wilt symptoms in the soil-  
395 soak assay (Fig 5B). By 72 h after tomato stems were directly inoculated through a cut leaf petiole the  
396 population size of  $\Delta norB$  in tomato mid-stems was around two orders of magnitude smaller than that  
397 of wild type (Fig. 5C). In contrast, neither the  $\Delta norA$  nor the  $\Delta hmpX$  mutant differed significantly  
398 from wild type with respect to bacterial wilt virulence or stem colonization after petiole inoculation.  
399 Results of these *in planta* experiments are consistent with the finding that the  $\Delta norB$  mutant  
400 accumulates toxic levels of NO that severely impair its growth in denitrifying culture. In contrast, the  
401  $\Delta norA$  and  $\Delta hmpX$  mutants functioned much like wild type in both conditions. The *in planta* defects  
402 of  $\Delta norB$  are likely explained by the mutant's inability to detoxify the NO generated by denitrifying  
403 respiration during plant pathogenesis. The defects further suggest that without either NorA or  
404 HmpX, *Rs* can overcome oxidative stress produced by bacterial denitrification and the plant host,  
405 likely by changing the transcription of iron and sulfur metabolism genes. However, despite massive  
406 transcriptomic changes *Rs* cannot compensate for loss of the NorB nitric oxide reductase as  
407 evidenced by the mutant's loss of virulence, plant colonization defects, and reduced fitness in  
408 culture.

#### 409 **NorA, NorB, and HmpX function together in denitrifying culture**

411 Detoxification of reactive radical species like NO is critically important for fitness of  
412 denitrifying bacteria (59-61). Although  $\Delta norA$  and  $\Delta hmpX$  single mutants had wild-type virulence and  
413 were only modestly reduced in late stage denitrifying growth compared to wild-type *Rs*, their  
414 transcriptional signatures indicated they did suffer RNS stress early in denitrifying cultures.  
415 Additionally, during denitrification the  $\Delta norB$  mutant strongly upregulated expression of *norA* and  
416 *hmpX*. We wondered how *Rs* would behave in the absence of two or more components of its RNS  
417 mitigation system.



418  
419  
420  
421  
422  
423  
424  
425  
426  
427  
428  
429  
430  
431  
432  
433

We therefore created double deletion mutants lacking multiple genes; *norA* and *norB* ( $\Delta norAB$ ); *norA* and *hmpX* ( $\Delta norAX$ ); *hmpX* and *norB* ( $\Delta norBX$ ). Persistent efforts to use the same methods to create a  $\Delta norA/norB/hmpX$  triple mutant were unsuccessful, suggesting that loss of all three proteins is lethal to *Rs*. After 16 h of growth under denitrifying conditions (corresponding to the time RNA was harvested for transcriptional analysis), the  $\Delta norAX$  double mutant grew as well as wild type. However, both double mutants lacking *norB* grew to lower endpoints (yield) than WT,  $\Delta norA$ , or  $\Delta hmpX$  ( $P < 0.0078$ , ANOVA), although the growth of  $\Delta norAB$  and  $\Delta norBX$  was not significantly different from that of the  $\Delta norB$  single mutant (Fig. 6A). After 36 h under denitrifying conditions, all single and double mutants had significantly lower  $Abs_{600}$  than wild type. Further, single and double mutants lacking NorB were dramatically reduced in growth at 36 h (Fig. 6B). The  $\Delta norAB$  and  $\Delta norBX$  double mutants grew only around 10% as much as wild-type,  $\Delta norA$ , or  $\Delta hmpX$  cells ( $P < 0.001$ , ANOVA). Additionally, these double mutants also reached a 35% lower  $Abs_{600}$  reading than the  $\Delta norB$  single mutant ( $P < 0.001$ , ANOVA). These cumulative growth differences show that the NorB nitric oxide reductase plays an irreplaceable role in mitigating NO stress both early and late in denitrifying growth in culture. However, the RIC protein NorA and oxidoreductase HmpX also protect *Rs* when NO accumulates, especially during later stages of denitrifying metabolism.

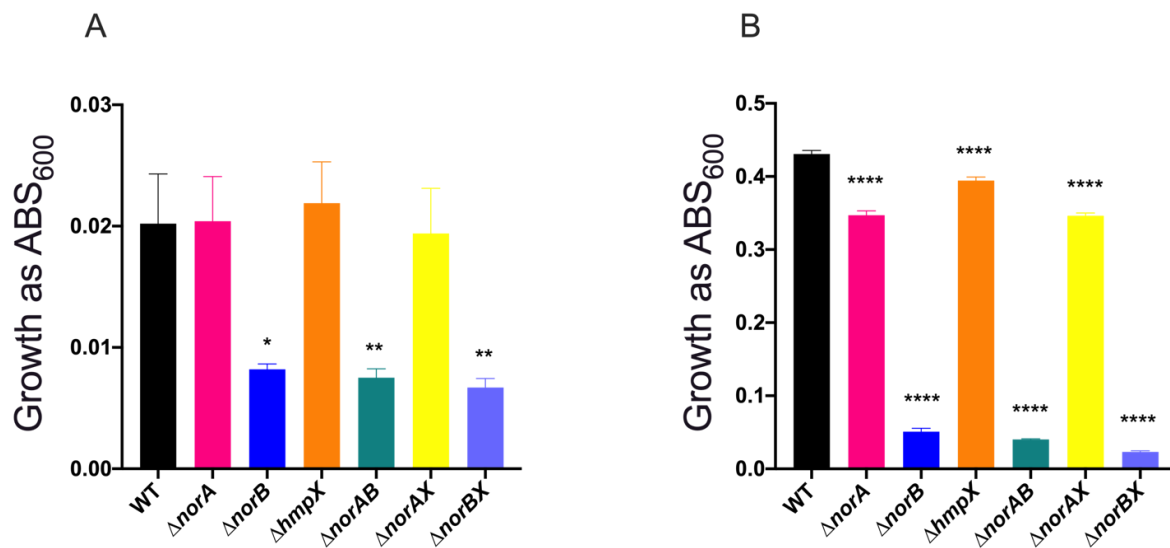

434  
435  
436  
437  
438  
439  
440  
441

**Figure 6. The NorB nitric oxide reductase is important for *R. solanacearum* growth in denitrifying conditions.** Growth of wild type,  $\Delta norA$ ,  $\Delta norB$ ,  $\Delta hmpX$ , and double mutants in VDM + 30 mM  $NO_3^-$  with 0.1%  $O_2$  shaking in 96 well plates, measured spectrophotometrically as absorbance at 600 nm, after **A.** 16 h culture or **B.** 36 h culture. Data shown reflect the mean  $\pm$  SEM of 4 biological replicate experiments, each containing 3 technical replicates. For both 16 h and 36 h, asterisks indicate difference from growth of the wild-type strain: \*  $P < 0.05$ , \*\*  $P < 0.008$ , \*\*\*\*  $P < 0.001$  (one-way ANOVA).

## ***norA*, *norB*, and *hmpX* contribute to cellular protection from oxidative stress**

Denitrifying metabolism damages iron-sulfur (Fe-S) cluster proteins like the TCA cycle enzymes fumarase and aconitase by binding to iron and changing the oxidative state of the bound catalytic center (36, 62). *Rs* mutants lacking *norA*, *norB*, or *hmpX* altered expression of many genes involved in iron and sulfur metabolism, which suggested these mutants experienced damage to Fe-S proteins and would be more susceptible to oxidative stress.

To test the hypothesis that *Rs* lacking NorA, NorB, or HmpX are more susceptible to oxidative stress, we treated denitrifying cultures with exogenous NO or H<sub>2</sub>O<sub>2</sub> at 16 and 36 h, then measured their growth recovery (Fig. S4). At 16 h, all tested strains recovered similarly from exposure to the NO donor spermine-NONOate (Fig S4A). At 36h, the  $\Delta norB$  mutant actually recovered from NO treatment better than all other strains ( $P < 0.0001$ , ANOVA). (Fig. S4B). Similarly, the  $\Delta norAB$ ,  $\Delta norAX$ , and  $\Delta norBX$  double mutants were more tolerant of H<sub>2</sub>O<sub>2</sub> than wild type at 16 h (Fig. S4C), although their recoveries did not differ at 36 h (Fig. S4D). We concluded that single or double mutants lacking *norA*, *norB*, or *hmpX* were not more susceptible to the levels of exogenous oxidative stress tested under these conditions.

As a measure of Fe-S cluster damage, we quantified aconitase activity in various *Rs* strains growing in denitrifying conditions, normalizing enzyme activity to cell density to account for differences in growth between strains. After 16 h of culture, wild-type and all mutant cells contained similar aconitase levels (data not shown). However, by 36 h, all strains lacking *norB* had reduced aconitase activity compared to wild-type cells (Fig. 7). While the wild-type strain contained an average of 0.58 milliunits/mL,  $\Delta norB$ ,  $\Delta norAB$ ,  $\Delta norBX$  produced 0.39, 0.33, and 0.27 milliunits/mL of active aconitase respectively ( $P = 0.0360$ , 0.0057, and 0.008 respectively, ANOVA). Aconitase activity in  $\Delta norAB$  and  $\Delta norBX$  double mutants trended lower than that in the  $\Delta norB$  single mutant, although they were not significantly different. At 0.42 milliunits/mL, aconitase activity in the  $\Delta norAX$  mutant similarly trended down but was not significantly different from wild-type. Together with the transcriptional profiles suggesting that  $\Delta norA$  and  $\Delta hmpX$  experience iron and sulfur stress, these trends indicate that NorA and HmpX help protect Fe-S proteins, including aconitase. However, NorB is the major source of *Rs* cellular protection in denitrifying conditions, as evidenced by both transcriptional and direct enzyme analyses.

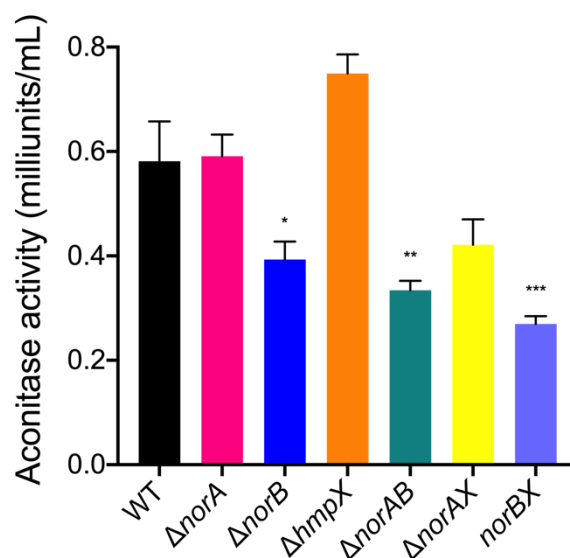

**Figure 7. *R. solanacearum* needs the NorB nitric oxide reductase to prevent damage to the iron-sulfur protein aconitase.** *R. solanacearum* wild type,  $\Delta norA$ ,  $\Delta norB$ ,  $\Delta hmpX$ , and double mutants were cultured for 36 h in VDM + 30 mM  $NO_3^-$  with 0.1%  $O_2$ . For each strain, activity of the abundant iron-sulfur protein aconitase was measured using the Aconitase Activity Assay Kit (Sigma-Aldrich) according to the manufacturer's instructions. Data shown reflect the mean $\pm$  SEM of 3 biological replicates. Asterisks indicate difference from growth of the wild-type strain: \*  $P = 0.0360$ , \*\* $P = 0.0057$ , \*\*\*  $P = 0.0008$  (ANOVA).

### Bacterially-produced NO affects plant host transcriptional responses

Having shown that oxidative stress is toxic to *Rs* cells both *in planta* and in culture, we investigated ways ROS could affect bacterial-plant interactions. NO is a free radical signaling molecule that affects every stage of the plant life cycle (27, 63, 64). In particular, NO interacts with plant hormones to change signaling pathways during plant growth and biotic interactions (27, 63, 65). We hypothesized that increasing the amount of NO produced by the pathogen would alter plant perception of *Rs* during infection. We tested this by comparing the transcriptomes of tomato plants infected with either wild-type *Rs* or the NO-accumulating  $\Delta norB$  mutant to the transcriptome of healthy plants. As expected, in response to infection by either wild-type *Rs* or  $\Delta norB$ , tomato plants significantly changed gene expression patterns, including pathways in the KEGG and GO categories of general cellular metabolism and processes involved in plant-pathogen interactions. (Fig. 8, Fig S6, Table S4). Differentially expressed genes (DEGs) fell into 39 KEGG categories in plants infected with wild type *Rs* and 42 categories for  $\Delta norB$ -infected plants, with 34 KEGG categories shared by plants infected with either strain. Overall,  $\Delta norB$  induced about twice as many DEGs in tomatoes as wild type *Rs* (Fig 8A). Most DEGs in plants infected with either wild-type or  $\Delta norB$  mutant cells changed

496  
497  
498  
499  
500  
501  
502  
503

expression of basic metabolic pathways, biosynthesis of secondary metabolites, plant-pathogen response, and plant hormone signal transduction. Wild-type *R. solanacearum* induced more DEGs involved in tomato starch and sucrose metabolism and photosynthesis. While wild-type *R. solanacearum* induced plant hormone signal transduction,  $\Delta norB$  mutant cells suppressed plant hormone signal transduction. Wild-type and  $\Delta norB$  mutant uniquely expressed plant DEGs in 5 and 8 KEGG categories respectively (Fig. S6A). Specifically, wild-type cells upregulated host plant nitrogen metabolism and carotenoid biosynthesis,  $\Delta norB$  cells induced biosynthesis of arginine and alkaloids.

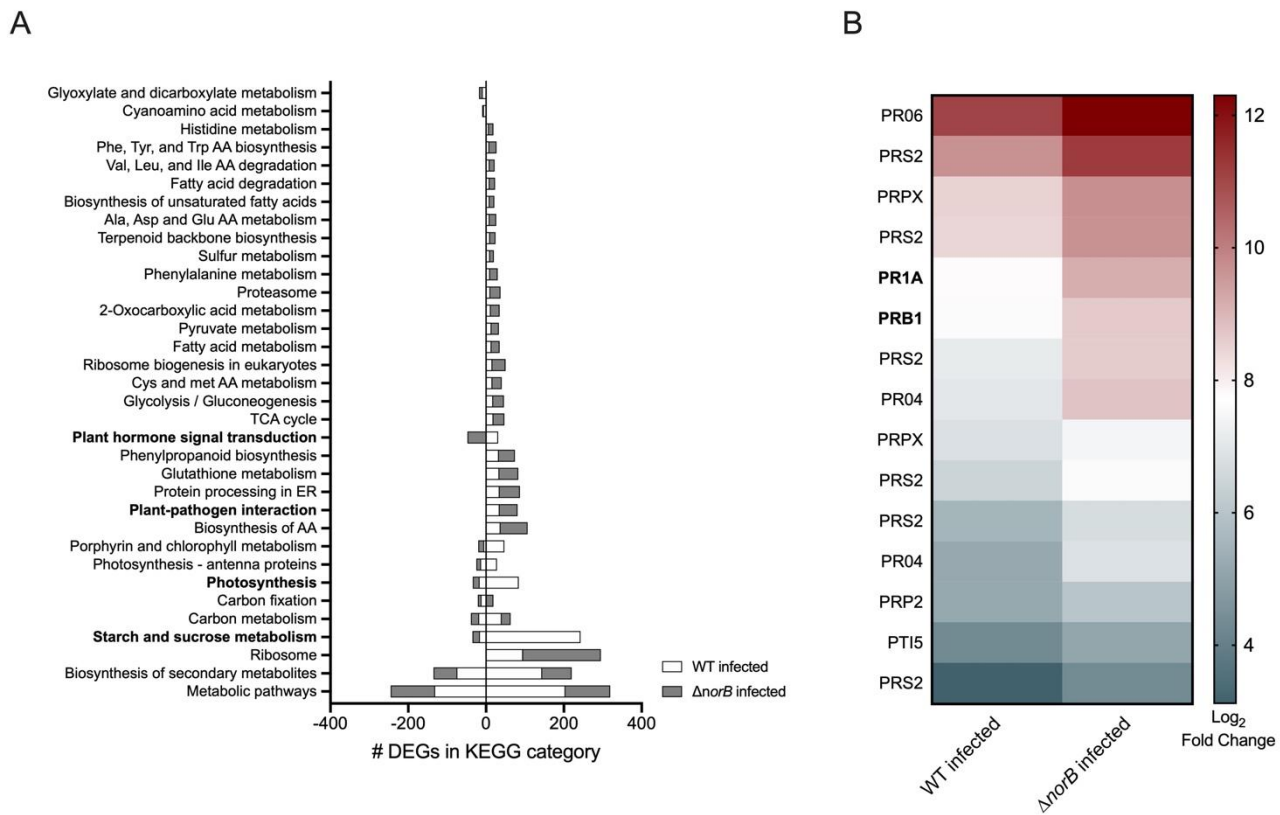

504  
505  
506  
507  
508  
509  
510  
511  
512  
513  
514  
515  
516

**Figure 8. Transcriptomic response of tomato plants infected with either *R. solanacearum* wild-type strain GMI1000 or the  $\Delta norB$  mutant.** RNA was harvested and sequenced from stems of ‘Bonny Best’ tomato plants 72 h after they were petiole-inoculated with  $2 \times 10^6$  CFU of either wild-type *R. solanacearum*,  $\Delta norB$  or water as a healthy control to determine differential gene expression. **A.** Differentially expressed tomato genes (DEGs) were sorted into 34 KEGG categories shared by both wild-type and  $\Delta norB$  infected plants. Number of DEGs in each KEGG category from wild-type or  $\Delta norB$  infected plants are graphed in stacked columns for comparison. The X axis shows the number of DEGs assorted into the indicated KEGG pathways, as determined with KOBAS software by NovoGene. For details on identification of DEGs, see methods. **B.** Expression levels of 15 pathogenesis-related genes in plants infected with either wild-type or  $\Delta norB$  *R. solanacearum* cells. Pathogenesis related DEGs were identified by searching the uniprot annotations (<https://www.uniprot.org/blast/>) of all DEGs for wild-type and  $\Delta norB$  infected plants for any genes annotated with the terms pathogen, pathogenesis, or biotic interaction.

517  
518 Most strikingly, plants infected with  $\Delta norB$  differentially upregulated all the pathogen  
519 response (PR) genes annotated with the KEGG terms pathogen, biotic, and defense, including the  
520 salicylic acid and ethylene pathway defense signaling genes PR1a and PR1b that were previously  
521 validated as contributing to tomato resistance to bacterial wilt (Fig 8B). Together, the KEGG and GO-  
522 term analyses of tomato DEGs showed that plants had different transcriptional responses to  
523 infection by wild-type *Rs* and  $\Delta norB$ . In particular, the tomato host mounted stronger defenses  
524 against the NO-overproducing  $\Delta norB$  mutant, possibly because the higher NO levels activate plant  
525 defense signaling pathways.

## 526 527 **Discussion**

528 Few bacteria can compete in the low-nutrient, low-oxygen niche of plant xylem vessels, but *R.*  
529 *solanacearum* (*Rs*) thrives in xylem in part by respiring on nitrate. The disadvantage of this metabolic  
530 strategy is that it generates potentially toxic levels of highly reactive NO as a byproduct. In addition,  
531 *Rs* cells in xylem confront ROS and RNS released by plant defenses (31, 51). Our goal was to  
532 determine how this pathogen protects itself from the resulting oxidative stress (6, 19). These  
533 mechanisms have been well studied in human pathogens, but little is known about how plant  
534 pathogenic bacteria mitigate the damaging effects of oxidative conditions they encounter in their  
535 hosts (31, 45).

536 Many bacteria accomplish this task with nitric oxide reductases (NORs) like NorB,  
537 flavorubredoxin oxido-reductases like HmpX, and repair of iron center proteins (RICs) like NorA (36,  
538 66). *Rs* homologs of all three of these proteins were well conserved at the amino acid level, notably  
539 at residues that bind cofactors.

540 The NorA hemerythrin-like domain includes the histidine residues needed to bind the iron  
541 cofactor, which are likely responsible for its RIC activity (62). We found that *norA*, but not *norB* or  
542 *hmpX*, is regulated by the NO-inducible transcriptional regulator NorR. Transcriptomic analysis of a  
543  $\Delta norR$  mutant indicated that *norA* is the only enzyme-encoding gene in the NorR regulon; this is  
544 noteworthy because NorR typically also regulates *norB* and/or *hmpX* (53, 55). The roles and  
545 regulation of RIC/NorA homologs have been studied in a few human pathogens but have not been  
546 considered in a plant pathogen (8, 28, 36, 40, 44).

547 NorB contains a large well conserved heme-copper oxidase domain responsible for NO  
548 reductase activity; this domain had homology to many other NOR proteins (12). Single subunit  
549 membrane-bound NORs like NorB are typically tied to the electron transport chain and generate ATP  
550 (12). However, rapid accumulation of NO in the  $\Delta norB$  mutant made it impossible to distinguish  
551 phenotypic effects of energy loss from those of NO toxicity, or to experimentally determine whether  
552 NorB contributes to ATP generation in *Rs*.

553 HmpX, which needs O<sub>2</sub> for its NO oxidase activity, can also reduce NO in anoxic conditions.  
554 The fact that HmpX contains highly conserved residues in both the globin-like NO-binding domain  
555 and in the FAD/NAD binding domains needed for full oxidoreductase activity suggests that *Rs*  
556 denitrifies or encounters RNS stress in both microaerobic and anoxic conditions (38). Both conditions  
557 occur in xylem vessels of *Rs*-infected plants (6). In addition to encountering low oxygen in plant hosts,  
558 *Rs* likely experiences low-oxygen denitrifying conditions in soil during its saprophytic life between  
559 plant hosts. Many soil-dwelling microbes depend on nitrate respiration and denitrification to thrive in  
560 highly variable soil microenvironments (67).

561 Taken together, the high conservation of these three protective proteins not only in *Rs*, but in  
562 other pathogens that do not contain the full denitrification pathway, such as enteric pathogens *E. coli*  
563 and *S. enterica*, suggests they are important for pathogen-host interactions, possibly to mitigate  
564 oxidative host defenses (68-70).

565 Transcriptomic analysis of *Rs* during denitrification revealed that NO damage globally changes  
566 the bacterium's gene expression. NorB and HmpX were recently shown to help *Rs* colonize tomato  
567 plants, but it was not clear if they contribute to *in planta* fitness because they mitigate nitrosative  
568 stress. Wild-type cells treated with NO strongly upregulated *norA*, *norB*, and *hmpX*, suggesting an  
569 important role in nitrosative stress response. Further, *Rs* mutants lacking these three genes had  
570 transcriptional signatures consistent with oxidative stress. In denitrifying conditions, all three  
571 mutants upregulated iron and sulfur metabolism to varying degrees. However, the  $\Delta norA$ ,  $\Delta norB$ , and  
572  $\Delta hmpX$  mutants also had distinct transcriptional profiles and they differentially expressed some  
573 shared DEGs at different magnitudes, suggesting redundant functionality by distinct mechanisms and  
574 a hierarchical importance where NorB > HmpX > NorA.

575 The most differentially expressed and most abundant gene transcripts in the *norA*, *norB*,  
576 and *hmpX* mutants were associated with iron and sulfur metabolism, consistent with damage to Fe-S  
577 proteins caused by accumulated nitrosative stress (36, 39, 71). Because NO is both highly reactive

578 and diffusible, it harms many cellular components and can also interact with S-nitrosylated proteins  
579 to change transcription in both the bacterium and the plant (72). The catalytic centers of iron and  
580 sulfur proteins are especially susceptible to oxidative damage (73). Common bacterial responses to  
581 nitrosative stress and Fe-S damage include upregulation of iron sulfur cluster biogenesis genes *isc/nif*,  
582 siderophore biosynthesis and secretion, and general bacterial stress response (SOS) systems (73-75).  
583 The transcriptomes of denitrifying *Rs* strains were consistent with this pattern. The  $\Delta norA$  mutant  
584 upregulated an iron sulfur biogenesis operon including *iscS/R* (Rsc1018-1026), and many iron  
585 acquisition genes, including the major ferric uptake regulator *FUR2* and putative siderophore  
586 biosynthesis and receptor proteins, *Rsp0419* and *Rsp0416*. This suggests *NorA* normally mitigates  
587 oxidative stress by repairing iron centers, so in its absence *Rs* cells become iron limited. The  $\Delta hmpX$   
588 mutant upregulated sulfur metabolism including *ssuB/E* and *sbp* genes, as well as the error prone  
589 DNA polymerase *dnaE2*. Upregulation of sulfur and damage response proteins is consistent with  
590 upregulation of sulfur metabolism to re-generate or repair damaged bio-available sulfur in Fe-S  
591 centers (76, 77). Alternatively,  $\Delta hmpX$  may acquire more sulfur to repair cysteine, which is commonly  
592 destroyed by oxidative stress (78). Over 2/3 of the *Rs* GMI1000 genome was differentially expressed  
593 in the  $\Delta norB$  mutant, which suffered intense nitrosative stress. As observed for  $\Delta norA$  and  $\Delta hmpX$ ,  
594 many of this mutant's most upregulated and most abundantly expressed genes were involved in iron  
595 and sulfur metabolism, but  $\Delta norB$  also upregulated additional damage response pathways. The  
596  $\Delta norB$  mutant transcriptome carries the signatures of substantial NO damage and an oxidative stress  
597 response, consistent with its growth defects in denitrifying culture and *in planta*.

598 Intriguingly, all three single mutants downregulated a cluster of genes encoding putative  
599 collagen-like binding adhesins. These are likely involved in cell-to-cell or cell-to-host attachment.  
600 Suppression of adhesion-related proteins suggests the hypothesis that *Rs* cells respond to oxidative  
601 stress by detaching from fellow bacteria or xylem vessel surfaces. Stress-induced detachment could  
602 help *Rs* cells escape from dense biofilms where toxic levels of NO accumulate, or from host cells  
603 releasing oxidative bursts. All three single mutants also upregulated degradation of the auxin  
604 phenylacetic acid, a plant growth hormone; auxins help shape tomato defenses against *Rs* (79, 80).  
605 By reducing levels of a plant hormone, *Rs* could change plant signaling, and reduce the oxidative  
606 defense response. It would be interesting to determine if a  $\Delta paa$  deletion mutant of *Rs* is less  
607 successful in plant hosts.

608 We previously determined that NorB acts in denitrifying conditions such as those found in  
609 xylem, but a mutant lacking this enzyme was as virulent as wild type when it was introduced directly  
610 into tomato xylem through a cut leaf petiole (6). However, deleting *norB* did significantly lower *Rs*  
611 virulence in a more holistic soil soak inoculation assay that forces the pathogen to find, enter, and  
612 colonize unwounded plants through the roots. Reduced  $\Delta$ *norB* mutant virulence following this  
613 naturalistic inoculation method suggests that *Rs* depends on NorB during the plant invasion process.  
614 At this point *Rs* cells may be more susceptible to oxidative stress produced by other *Rs* cells,  
615 competing microbes, or by the plant host. Although the  $\Delta$ *norA* and  $\Delta$ *hmpX* mutants had wild-type  
616 virulence and plant colonization, our *in vitro* experiments confirmed that NorA, NorB, and HmpX are  
617 all required for normal growth under denitrifying conditions. Although  $\Delta$ *norA* and  $\Delta$ *hmpX* strains  
618 suffered only mild growth defects in denitrifying culture, these two proteins may be important for  
619 NO detoxification in the microaerobic soil environments where *Rs* survives between plant hosts. It  
620 would be interesting to see if the  $\Delta$ *norA*,  $\Delta$ *norB*, and  $\Delta$ *hmpX* mutants survive as well as wild-type *Rs*  
621 in low-oxygen soil microcosms.

622 Growth of single  $\Delta$ *norA* and  $\Delta$ *hmpX* mutants in denitrifying culture plateaued earlier than that  
623 of wild type and furthermore these mutants had significant growth defects at 36 h but not 16 h,  
624 suggesting these proteins contribute to *Rs* fitness when oxidative stress accumulated. Under these  
625 conditions the  $\Delta$ *norB* mutant quickly accumulated large amounts of NO, and its growth arrest  
626 coincided exactly with spiking NO levels in the culture. The toxic effects of NO likely drove the global  
627 gene expression changes observed in the  $\Delta$ *norB* mutant, which was sampled for transcriptomic  
628 analysis after 16 h of culture. These data suggest that at this point  $\Delta$ *norB* cells were so damaged they  
629 were simultaneously trying to repair proteins and synthesize them *de novo*. In an apparent attempt  
630 to compensate, the  $\Delta$ *norB* mutant also upregulated expression of *hmpX* and *norA*, as well as genes  
631 for many Fe-S enzymes including aconitase. Enzyme activity assays confirmed that *Rs* strains lacking  
632 *norB* had reduced aconitase activity, a direct indicator of global cellular damage. In contrast,  
633 aconitase activity was not significantly lower than wild type in *norA* or *hmpX* single or double  
634 mutants. This suggests that cells depend on NorA and HmpX when NorB can no longer reduce the  
635 cellular pool of NO. Measuring growth of  $\Delta$ *norA* and  $\Delta$ *hmpX* mutants on older plants that have more  
636 developed immune systems, larger xylem vessels, and larger populations of denitrifying bacteria  
637 where the pathogen experiences more oxidative stress per cell could reveal if NorA and HmpX make  
638 quantitative fitness contributions in late stage disease.



639 We hypothesized that loss of RNS mitigating proteins would make *Rs* more susceptible to  
640 oxidative stress, but on the contrary, all three double mutants trended towards increased ability to  
641 recover from treatment with H<sub>2</sub>O<sub>2</sub>. We speculate that because of their defects, these strains were  
642 already experiencing enough oxidative stress that they were primed to mitigate the inhibitory effects  
643 of H<sub>2</sub>O<sub>2</sub> more effectively than wild-type (81). This is consistent with our previous observation that *Rs*  
644 cells isolated directly from the oxidative plant environment have higher tolerance of oxidative and  
645 cold stress than *Rs* cells grown *in vitro* (51). Analyzing the transcriptomes of double mutants could  
646 reveal if their unexpectedly high stress tolerance is explained by upregulation of genes involved in  
647 iron and sulfur metabolism, the SOS response, and other stress repair mechanisms.

648 Tomato plants responded differently at the transcriptional level to infection with NO-  
649 accumulating  $\Delta norB$  mutant than to infection with wild-type *Rs*. Relative to healthy control plants,  
650  $\Delta norB$  induced more tomato DEGs than wild type *Rs*. However, plants infected with wild-type *Rs*  
651 expressed more starch and sucrose metabolism genes and more genes involved in photosynthesis.  
652 This could indicate that during successful infection *Rs* cells manipulate their plant host to increase  
653 available nutrients. It is theorized that *Rs* forces plants to load sugar into xylem sap, but the  
654 mechanism is still unknown (46). Alternatively, increased defenses triggered by the  $\Delta norB$  mutant  
655 may reduce photosynthesis as part of the well-established growth versus defense tradeoff. It was  
656 also interesting that only wild-type *Rs* differentially induced genes in the KEGG category “nitrogen  
657 metabolism”. However, arginine biosynthesis was upregulated exclusively in  $\Delta norB$  infected plants.  
658 Arginine is thought to be involved in plant nitric oxide synthase (NOS) activity, which oxidizes L-  
659 arginine to NO and L-citrulline (82). Increased arginine expression by  $\Delta norB$  infected plants suggests  
660 that either the NO accumulated by this mutant is sufficient to change plant signaling and induce NOS,  
661 or that accumulated NO is causing a damage response.

662 Plants can recognize damage-associated molecular patterns (DAMPs, such as cell wall fragments  
663 and extracellular non-self-DNA) and pathogen-associated molecular patterns (PAMPs, like flagellar  
664 proteins and peptidoglycan) (83-85). In response to DAMPs and PAMPs, both plants and animals produce  
665 a defensive burst of ROS and RNS like H<sub>2</sub>O<sub>2</sub> and NO (86). As discussed above, its strong oxidative  
666 properties make NO a potent antimicrobial compound. However, NO is also a key actor in plant defense  
667 signaling pathways. Notably, all tomato genes annotated with the terms pathogen, biotic, and defense  
668 were expressed at higher levels in plants infected with  $\Delta norB$ . This heightened defense suggested that  
669 bacterially produced NO made the *Rs* cells more visible to plants and could be one reason why the  $\Delta norB$

670 mutant suffers reduced virulence. We speculate that in addition to protecting itself from oxidative  
671 damage, *Rs* may also reduce NO levels in order to hide from its plant hosts. It would be interesting to  
672 measure defense responses and bacterial wilt disease susceptibility in plants pretreated with exogenous  
673 NO. If high NO levels can alter plant signal transduction, NO-treated plants would have broadly enhanced  
674 disease resistance.

### 675 **Acknowledgements**

676 The authors thank Corri D. Hamilton and Mark Mandel for helpful discussions and manuscript review.  
677  
678  
679

680

681

682

683

684

685

686

687

688

689

690

691

692

693

694

695

696

697

698

699

700

701

702

703

704

705

706

707

708

709

710

711

712

713

714

715

716

717

718

719

720

721

722

723

724

725

726

727

## References

1. Mansfield J, Genin S, Magori S, Citovsky V, Sriariyanum M, Ronald P, Dow M, Verdier V, Beer SV, Machado MA, Toth I, Salmond G, Foster GD. 2012. Top 10 plant pathogenic bacteria in molecular plant pathology. *Mol Plant Pathol* 13:614-29.
2. Allen C, Prior P, Hayward AC. 2005. Bacterial Wilt Disease and the *Ralstonia solanacearum* Species Complex. American Phytopathological Society.
3. Khokhani D, Lowe-Power TM, Tran TM, Allen C. 2017. A Single Regulator Mediates Strategic Switching between Attachment/Spread and Growth/Virulence in the Plant Pathogen *Ralstonia solanacearum*. *Mbio* 8.
4. de Pedro-Jove R, Puigvert M, Sebastia P, Macho AP, Monteiro JS, Coll NS, Setubal JC, Valls M. 2021. Dynamic expression of *Ralstonia solanacearum* virulence factors and metabolism-controlling genes during plant infection. *BMC Genomics* 22:170.
5. Peyraud R, Cottret L, Marmiesse L, Genin S. 2018. Control of primary metabolism by a virulence regulatory network promotes robustness in a plant pathogen. *Nature Communications* 9.
6. Dalsing BL, Truchon AN, Gonzalez-Orta ET, Milling AS, Allen C. 2015. *Ralstonia solanacearum* uses inorganic nitrogen metabolism for virulence, ATP production, and detoxification in the oxygen-limited host xylem environment. *MBio* 6:e02471.
7. Baron S, Albrecht T. 1996. Medical microbiology, 4th ed. University of Texas Medical Branch at Galveston, Dept. of Microbiology & Immunology, Galveston, Tex.
8. Zumft WG. 1997. Cell biology and molecular basis of denitrification. *Microbiol Mol Biol Rev* 61:533-616.
9. Martens DA, Hillel D. 2005. Denitrification, p 378-382. Elsevier, Oxford.
10. Philip Robertson G, Jackson LE. 1997. 10 - Nitrogen Use Efficiency in Row-Crop Agriculture: Crop Nitrogen Use and Soil Nitrogen Loss, p 347-365, Physiological Ecology. Academic Press.
11. Hansell DA, Follows MJ, Capone DG, Bronk DA, Mulholland MR, Carpenter EJ. 2008. Chapter 13 - Nitrogen in the Atlantic Ocean, p 597-630. Academic Press, San Diego.
12. Zumft WG. 2005. Nitric oxide reductases of prokaryotes with emphasis on the respiratory, heme-copper oxidase type. *J Inorg Biochem* 99:194-215.
13. Vitale A, Paszti S, Takahashi K, Toyofuku M, Pessi G, Eberl L. 2020. Mapping of the Denitrification Pathway in *Burkholderia thailandensis* by Genome-Wide Mutant Profiling. *Journal of Bacteriology* 202.
14. Rinne J, Pihlatie M, Lohila A, Thum T, Aurela M, Tuovinen JP, Laurila T, Vesala T. 2005. Nitrous oxide emissions from a municipal landfill. *Environmental Science & Technology* 39:7790-7793.
15. Wang J, Chadwick DR, Cheng Y, Yan X. 2018. Global analysis of agricultural soil denitrification in response to fertilizer nitrogen. *Sci Total Environ* 616-617:908-917.
16. Remenant B, de Cambiaire JC, Cellier G, Jacobs JM, Mangenot S, Barbe V, Lajus A, Vallenet D, Medigue C, Fegan M, Allen C, Prior P. 2011. *Ralstonia syzygii*, the Blood Disease Bacterium and some Asian *R. solanacearum* strains form a single genomic species despite divergent lifestyles. *PLoS One* 6:e24356.
17. Remenant B, Coupat-Goutaland B, Guidot A, Cellier G, Wicker E, Allen C, Fegan M, Pruvost O, Elbaz M, Calteau A, Salvignol G, Mornico D, Mangenot S, Barbe V, Medigue C, Prior P. 2010. Genomes of three tomato pathogens within the *Ralstonia solanacearum* species complex reveal significant evolutionary divergence. *Bmc Genomics* 11.
18. Hayward AC, Elnashaar HM, Nydegger U, Delindo L. 1990. Variation in nitrate metabolism in biovars of *Pseudomonas solanacearum*. *Journal of Applied Bacteriology* 69:269-280.
19. Jacobs JM, Babujee L, Meng F, Milling A, Allen C. 2012. The *in planta* transcriptome of *Ralstonia solanacearum*: conserved physiological and virulence strategies during bacterial wilt of tomato. *mBio* 3.

- 728 20. Ischiropoulos H, Gow A. 2005. Pathophysiological functions of nitric oxide-mediated protein  
729 modifications. *Toxicology* 208:299-303.
- 730 21. Murphy MP. 1999. Nitric oxide and cell death. *Biochim Biophys Acta* 1411:401-14.
- 731 22. Lancaster JR. 2006. Nitroxidative, nitrosative, and nitrative stress: Kinetic predictions of reactive  
732 nitrogen species chemistry under biological conditions. *Chemical Research in Toxicology* 19:1160-  
733 1174.
- 734 23. Hill BG, Dranka BP, Bailey SM, Lancaster JR, Jr., Darley-Usmar VM. 2010. What part of NO don't you  
735 understand? Some answers to the cardinal questions in nitric oxide biology. *J Biol Chem* 285:19699-  
736 704.
- 737 24. Moncada S, Higgs EA. 2006. The discovery of nitric oxide and its role in vascular biology. *Br J*  
738 *Pharmacol* 147 Suppl 1:S193-201.
- 739 25. Nathan C, Xie QW. 1994. Nitric oxide synthases: roles, tolls, and controls. *Cell* 78:915-8.
- 740 26. Santolini J, Andre F, Jeandroz S, Wendehenne D. 2017. Nitric oxide synthase in plants: Where do we  
741 stand? *Nitric Oxide* 63:30-38.
- 742 27. Domingos P, Prado AM, Wong A, Gehring C, Feijo JA. 2015. Nitric oxide: a multitasked signaling gas  
743 in plants. *Mol Plant* 8:506-20.
- 744 28. Poole RK. 2020. Flavohaemoglobin: the pre-eminent nitric oxide-detoxifying machine of  
745 microorganisms. *F1000Res* 9.
- 746 29. Boccara M, Mills CE, Zeier J, Anzi C, Lamb C, Poole RK, Delledonne M. 2005. Flavohaemoglobin  
747 HmpX from *Erwinia chrysanthemi* confers nitrosative stress tolerance and affects the plant  
748 hypersensitive reaction by intercepting nitric oxide produced by the host. *Plant J* 43:226-37.
- 749 30. Poole RK. 2005. Nitric oxide and nitrosative stress tolerance in bacteria. *Biochem Soc Trans* 33:176-80.
- 750 31. Flores-Cruz Z, Allen C. 2009. *Ralstonia solanacearum* encounters an oxidative environment during  
751 tomato infection. *Mol Plant Microbe Interact* 22:773-82.
- 752 32. Schreiber K, Krieger R, Benkert B, Eschbach M, Arai H, Schobert M, Jahn D. 2007. The anaerobic  
753 regulatory network required for *Pseudomonas aeruginosa* nitrate respiration. *J Bacteriol* 189:4310-4.
- 754 33. Lewis AM, Matzdorf SS, Endres JL, Windham IH, Bayles KW, Rice KC. 2015. Examination of the  
755 *Staphylococcus aureus* nitric oxide reductase (saNOR) reveals its contribution to modulating  
756 intracellular NO levels and cellular respiration. *Mol Microbiol* 96:651-69.
- 757 34. Cardinale JA, Clark VL. 2005. Determinants of nitric oxide steady-state levels during anaerobic  
758 respiration by *Neisseria gonorrhoeae*. *Mol Microbiol* 58:177-88.
- 759 35. Boulanger MJ, Murphy ME. 2002. Crystal structure of the soluble domain of the major anaerobically  
760 induced outer membrane protein (AniA) from pathogenic *Neisseria*: a new class of copper-containing  
761 nitrite reductases. *J Mol Biol* 315:1111-27.
- 762 36. Silva LSO, Baptista JM, Batley C, Andrews SC, Saraiva LM. 2018. The Di-iron RIC Protein (YtfE) of  
763 *Escherichia coli* Interacts with the DNA-Binding Protein from Starved Cells (Dps) To Diminish RIC  
764 Protein-Mediated Redox Stress. *J Bacteriol* 200.
- 765 37. Kim SO, Orii Y, Lloyd D, Hughes MN, Poole RK. 1999. Anoxic function for the *Escherichia coli*  
766 flavohaemoglobin (Hmp): reversible binding of nitric oxide and reduction to nitrous oxide. *FEBS Lett*  
767 445:389-94.
- 768 38. Gardner PR, Gardner AM, Brashear WT, Suzuki T, Hvitved AN, Setchell KD, Olson JS. 2006.  
769 Hemoglobins dioxygenate nitric oxide with high fidelity. *J Inorg Biochem* 100:542-50.
- 770 39. Forrester MT, Foster MW. 2012. Protection from nitrosative stress: a central role for microbial  
771 flavohemoglobin. *Free Radic Biol Med* 52:1620-33.
- 772 40. Overton TW, Justino MC, Li Y, Baptista JM, Melo AMP, Cole JA, Saraiva LM. 2008. Widespread  
773 distribution in pathogenic bacteria of di-iron proteins that repair oxidative and nitrosative damage to  
774 iron-sulfur centers. *Journal of Bacteriology* 190:2004-2013.
- 775 41. Harrington JC, Wong SM, Rosadini CV, Garifulin O, Boyartchuk V, Akerley BJ. 2009. Resistance of  
776 *Haemophilus influenzae* to reactive nitrogen donors and gamma interferon-stimulated macrophages

- 777 requires the formate-dependent nitrite reductase regulator-activated ytfE gene. *Infect Immun* 77:1945-  
778 58.
- 779 42. Cramm R, Strube K. 2008. Redox-controlled dinitrosyl formation at the diiron-oxo center of NorA.  
780 Globins and Other Nitric Oxide-Reactive Proteins, Part B 437:103-116.
- 781 43. Pal N, Jana M, Majumdar A. 2021. Reduction of NO by diiron complexes in relation to flavodiiron  
782 nitric oxide reductases. *Chemical Communications* 57:8682-8698.
- 783 44. Silva LSO, Matias PM, Romao CV, Saraiva LM. 2021. Structural Basis of RICs Iron Donation for Iron-  
784 Sulfur Cluster Biogenesis. *Front Microbiol* 12:670681.
- 785 45. Flores-Cruz Z, Allen C. 2011. Necessity of OxyR for the hydrogen peroxide stress response and full  
786 virulence in *Ralstonia solanacearum*. *Appl Environ Microbiol* 77:6426-32.
- 787 46. Lowe-Power TM, Hendrich CG, von Roepenack-Lahaye E, Li B, Wu DS, Mitra R, Dalsing BL, Ricca P,  
788 Naidoo J, Cook D, Jancewicz A, Masson P, Thomma B, Lahaye T, Michael AJ, Allen C. 2018.  
789 Metabolomics of tomato xylem sap during bacterial wilt reveals *Ralstonia solanacearum* produces  
790 abundant putrescine, a metabolite that accelerates wilt disease. *Environmental Microbiology* 20:1330-  
791 1349.
- 792 47. Khokhani D, Tran TM, Lowe-Power TM, Allen C. 2018. Plant assays for quantifying *Ralstonia*  
793 *solanacearum* virulence. *Bio-Protocol* 8.
- 794 48. Tans-Kersten J, Huang H, Allen C. 2001. *Ralstonia solanacearum* needs motility for invasive virulence  
795 on tomato. *J Bacteriol* 183:3597-605.
- 796 49. Hendrich CG, Truchon AN, Dalsing BL, Allen C. 2020. Nitric Oxide Regulates the *Ralstonia*  
797 *solanacearum* Type 3 Secretion System. bioRxiv doi:10.1101/2020.10.26.355339:2020.10.26.355339.
- 798 50. Love MI, Huber W, Anders S. 2014. Moderated estimation of fold change and dispersion for RNA-seq  
799 data with DESeq2. *Genome Biol* 15:550.
- 800 51. Colburn-Clifford JM, Scherf JM, Allen C. 2010. *Ralstonia solanacearum* Dps contributes to oxidative  
801 stress tolerance and to colonization of and virulence on tomato plants. *Appl Environ Microbiol* 76:7392-  
802 9.
- 803 52. Novichkov PS, Kazakov AE, Ravcheev DA, Leyn SA, Kovaleva GY, Sutormin RA, Kazanov MD,  
804 Riehl W, Arkin AP, Dubchak I, Rodionov DA. 2013. RegPrecise 3.0--a resource for genome-scale  
805 exploration of transcriptional regulation in bacteria. *BMC Genomics* 14:745.
- 806 53. Rodionov DA, Dubchak IL, Arkin AP, Alm EJ, Gelfand MS. 2005. Dissimilatory metabolism of  
807 nitrogen oxides in bacteria: comparative reconstruction of transcriptional networks. *PLoS Comput Biol*  
808 1:e55.
- 809 54. Cramm R, Busch A, Strube K. 2006. NO-dependent transcriptional activation of gene expression in  
810 *Ralstonia eutropha* H16. *Biochemical Society Transactions* 34:182-184.
- 811 55. Klink A, Elsner B, Strube K, Cramm R. 2007. Characterization of the signaling domain of the NO-  
812 responsive regulator NorR from *Ralstonia eutropha* H16 by site-directed mutagenesis. *Journal of*  
813 *Bacteriology* 189:2743-2749.
- 814 56. Pohlmann A, Cramm R, Schmelz K, Friedrich B. 2000. A novel NO-responding regulator controls the  
815 reduction of nitric oxide in *Ralstonia eutropha*. *Molecular Microbiology* 38:626-638.
- 816 57. Foster PL. 2007. Stress-induced mutagenesis in bacteria. *Crit Rev Biochem Mol Biol* 42:373-97.
- 817 58. Maslowska KH, Makiela-Dzbenka K, Fijalkowska IJ. 2019. The SOS system: A complex and tightly  
818 regulated response to DNA damage. *Environ Mol Mutagen* 60:368-384.
- 819 59. Hernandez-Urzuu E, Zamorano-Sanchez DS, Ponce-Coria J, Morett E, Grogan S, Poole RK, Membrillo-  
820 Hernandez J. 2007. Multiple regulators of the Flavohaemoglobin (hmp) gene of *Salmonella enterica*  
821 serovar Typhimurium include RamA, a transcriptional regulator conferring the multidrug resistance  
822 phenotype. *Archives of Microbiology* 187(1):67-77.
- 823 60. Cramm R. 2009. Genomic View of Energy Metabolism in *Ralstonia eutropha* H16. *Journal of*  
824 *Molecular Microbiology and Biotechnology* 16:38-52.

- 825 61. Braker G, Tiedje JM. 2003. Nitric oxide reductase (*norB*) genes from pure cultures and environmental  
826 samples. *Applied and Environmental Microbiology* 69(6):3476-3483.
- 827 62. Strube K, de Vries S, Cramm R. 2007. Formation of a dinitrosyl iron complex by NorA, a nitric oxide-  
828 binding Di-iron protein from *Ralstonia eutropha* H16. *Journal of Biological Chemistry* 282:20292-  
829 20300.
- 830 63. Parankusam S, Adimulam SS, Bhatnagar-Mathur P, Sharma KK. 2017. Nitric Oxide (NO) in Plant Heat  
831 Stress Tolerance: Current Knowledge and Perspectives. *Front Plant Sci* 8:1582.
- 832 64. Qi JS, Song CP, Wang BS, Zhou JM, Kangasjarvi J, Zhu JK, Gong ZZ. 2018. Reactive oxygen species  
833 signaling and stomatal movement in plant responses to drought stress and pathogen attack. *Journal of*  
834 *Integrative Plant Biology* 60:805-826.
- 835 65. Serrano I, Romero-Puertas MC, Sandalio LM, Olmedilla A. 2015. The role of reactive oxygen species  
836 and nitric oxide in programmed cell death associated with self-incompatibility. *J Exp Bot* 66:2869-76.
- 837 66. Bowman LA, McLean S, Poole RK, Fukuto JM. 2011. The diversity of microbial responses to nitric  
838 oxide and agents of nitrosative stress: close cousins but not identical twins. *Adv Microb Physiol* 59:135-  
839 219.
- 840 67. Ambus P, Zechmeister-Boltenstern S. 2007. Denitrification and N-Cycling in Forest Ecosystems.  
841 *Biology of the Nitrogen Cycle* doi:Doi 10.1016/B978-044452857-5.50023-0:343-358.
- 842 68. Lahiri A, Das P, Chakravorty D. 2008. Arginase modulates *Salmonella* induced nitric oxide production  
843 in RAW264.7 macrophages and is required for *Salmonella* pathogenesis in mice model of infection.  
844 *Microbes Infect* 10:1166-74.
- 845 69. Kaldorf M, Linne von Berg KH, Meier U, Servos U, Bothe H. 1993. The reduction of nitrous oxide to  
846 dinitrogen by *Escherichia coli*. *Arch Microbiol* 160:432-9.
- 847 70. Durand S, Guillier M. 2021. Transcriptional and Post-transcriptional Control of the Nitrate Respiration  
848 in Bacteria. *Front Mol Biosci* 8:667758.
- 849 71. Hantke K. 2001. Iron and metal regulation in bacteria. *Curr Opin Microbiol* 4:172-7.
- 850 72. Ortega-Galisteo AP, Rodriguez-Serrano M, Pazmino DM, Gupta DK, Sandalio LM, Romero-Puertas  
851 MC. 2012. S-Nitrosylated proteins in pea (*Pisum sativum* L.) leaf peroxisomes: changes under abiotic  
852 stress. *J Exp Bot* 63:2089-103.
- 853 73. Gao F. 2020. Iron-Sulfur Cluster Biogenesis and Iron Homeostasis in Cyanobacteria. *Front Microbiol*  
854 11:165.
- 855 74. Jacobson MR, Brigle KE, Bennett LT, Setterquist RA, Wilson MS, Cash VL, Beynon J, Newton WE,  
856 Dean DR. 1989. Physical and genetic map of the major *nif* gene cluster from *Azotobacter vinelandii*. *J*  
857 *Bacteriol* 171:1017-27.
- 858 75. Khan A, Singh P, Srivastava A. 2018. Synthesis, nature and utility of universal iron chelator -  
859 Siderophore: A review. *Microbiol Res* 212-213:103-111.
- 860 76. Braymer JJ, Lill R. 2017. Iron-sulfur cluster biogenesis and trafficking in mitochondria. *J Biol Chem*  
861 292:12754-12763.
- 862 77. Agar JN, Krebs C, Frazzon J, Huynh BH, Dean DR, Johnson MK. 2000. IscU as a scaffold for iron-  
863 sulfur cluster biosynthesis: sequential assembly of [2Fe-2S] and [4Fe-4S] clusters in IscU. *Biochemistry*  
864 39:7856-62.
- 865 78. Choi H, Kim S, Mukhopadhyay P, Cho S, Woo J, Storz G, Ryu SE. 2001. Structural basis of the redox  
866 switch in the OxyR transcription factor. *Cell* 105:103-13.
- 867 79. French E, Kim BS, Rivera-Zuluaga K, Iyer-Pascuzzi AS. 2018. Whole Root Transcriptomic Analysis  
868 Suggests a Role for Auxin Pathways in Resistance to *Ralstonia solanacearum* in Tomato. *Molecular*  
869 *Plant-Microbe Interactions* 31(4):432-444.
- 870 80. Hammad Y, Nalin R, Marechal J, Fiasson K, Pepin R, Berry AM, Normand P, Domenach AM. 2003. A  
871 possible role for phenyl acetic acid (PAA) on *Alnus glutinosa* nodulation by *Frankia*. *Plant and Soil*  
872 254(1):193-205.

- 873 81. Chowdhury R, Sahu GK, Das J. 1996. Stress response in pathogenic bacteria. *Journal of Biosciences*  
874 21:149-160.
- 875 82. Piterkova J, Petrivalsky M, Luhova L, Mieslerova B, Sedlarova M, Lebeda A. 2009. Local and systemic  
876 production of nitric oxide in tomato responses to powdery mildew infection. *Mol Plant Pathol* 10:501-  
877 13.
- 878 83. Gust AA, Pruitt R, Nurnberger T. 2017. Sensing Danger: Key to Activating Plant Immunity. *Trends*  
879 *Plant Sci* 22:779-791.
- 880 84. De Lorenzo G, Ferrari S, Cervone F, Okun E. 2018. Extracellular DAMPs in Plants and Mammals:  
881 Immunity, Tissue Damage and Repair. *Trends Immunol* 39:937-950.
- 882 85. Heil M, Land WG. 2014. Danger signals - damaged-self recognition across the tree of life. *Front Plant*  
883 *Sci* 5:578.
- 884 86. Turkan I. 2018. ROS and RNS: key signalling molecules in plants. *Journal of Experimental Botany*  
885 69:3313-3315.
- 886
